# Supplementary material
Source: MDPI journal article supplement (https://www.mdpi.com/2077-0472/11/10/985)
Supplement: s1 [file s1 › agriculture-1365124-supplementary.pdf]

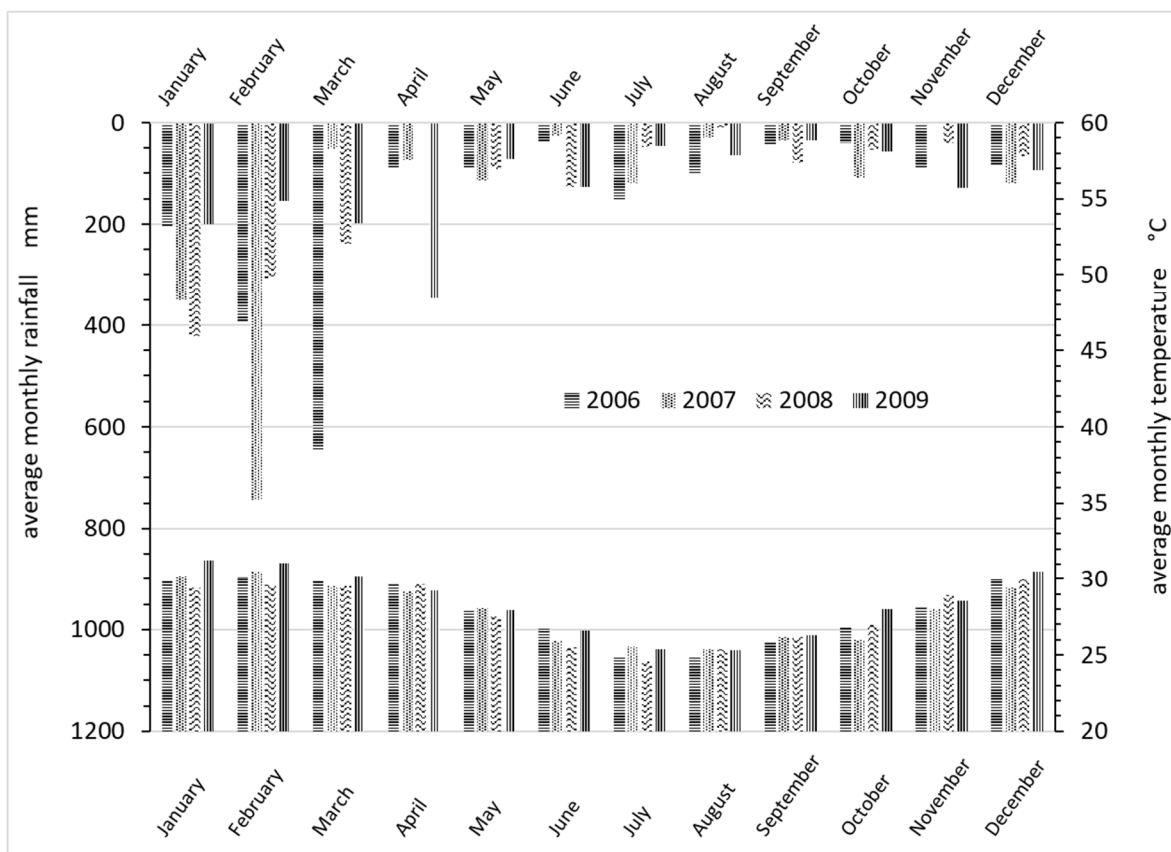

**Figure S1.** Average monthly rainfall (mm) and temperature (°C).

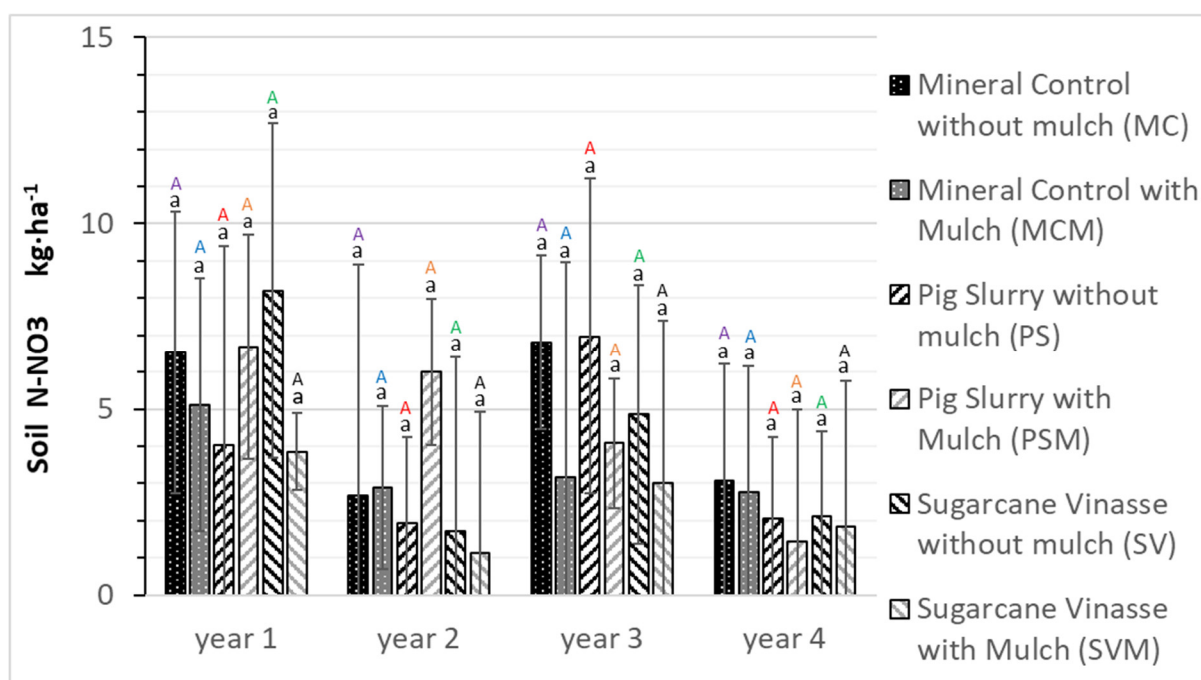

**Figure S2.** KCl extraction of soil nitrate (N-NO<sub>3</sub>), for each treatment in all four years. Error bars correspond to the standard deviation between replicates for each treatment. The same letters indicate no significant differences between two treatments in a given year. Lower case letters compare treatment in the same year and upper case letters compare treatments between years.

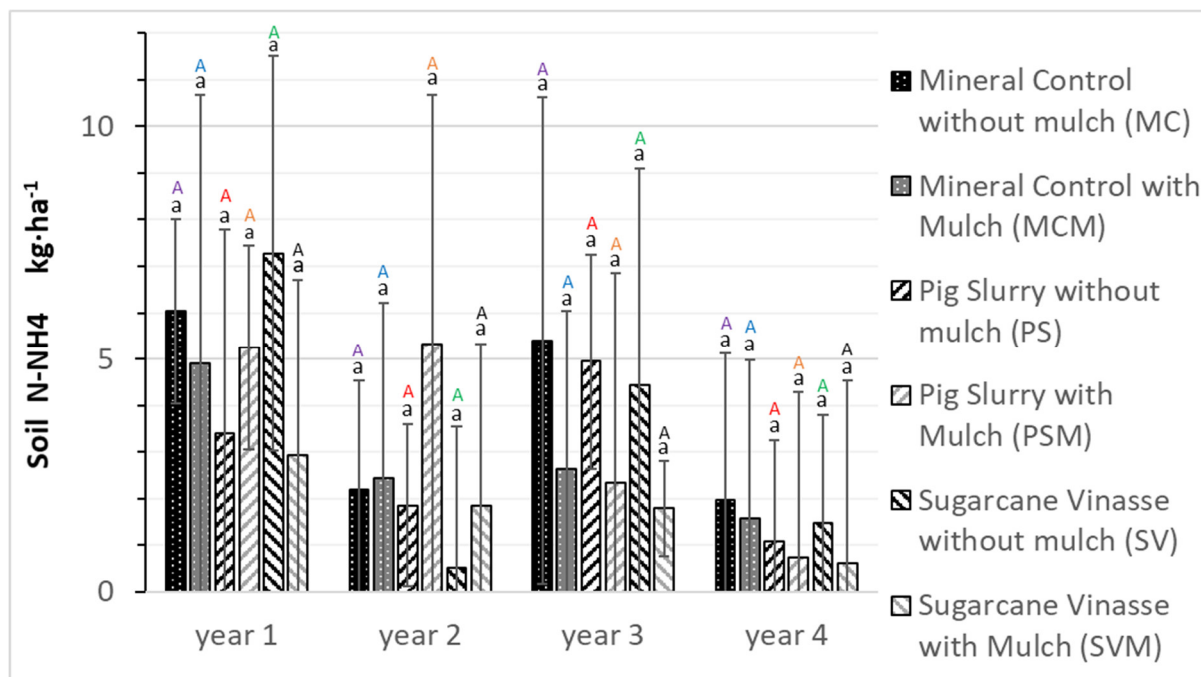

**Figure S3.** KCl extraction of soil ammonium (N-NH<sub>4</sub>) under each treatment in all four years. Error bars correspond to the standard deviation between replicates for each treatment. Identical letters indicate no significant differences between two treatments in a given year. Small letters compare treatment in the same year and capital letters compare treatments between years.

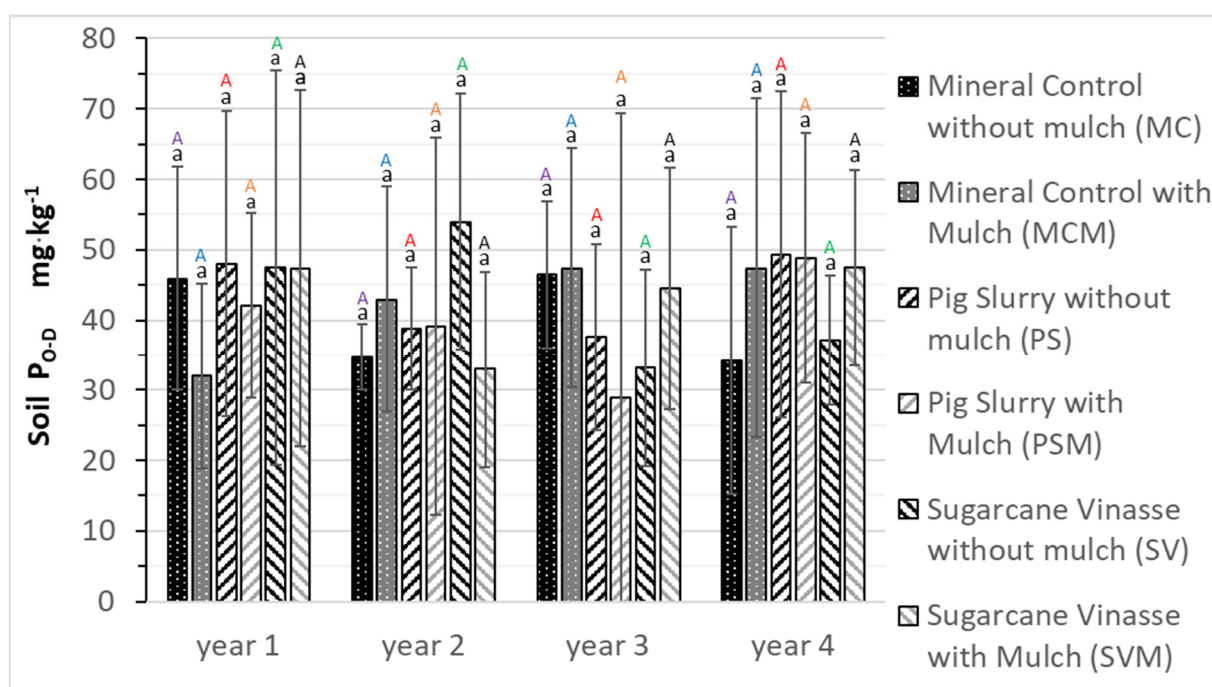

**Figure S4.** Soil exchangeable phosphorus (P<sub>O-D</sub>) determined using the Olsen–Dabin method, for each treatment in all four years. Error bars correspond to the standard deviation between replicates for each treatment. Identical letters indicate no significant differences between two treatments in a given year. Small letters compare treatment in a given year and capital letters compare treatments between years.

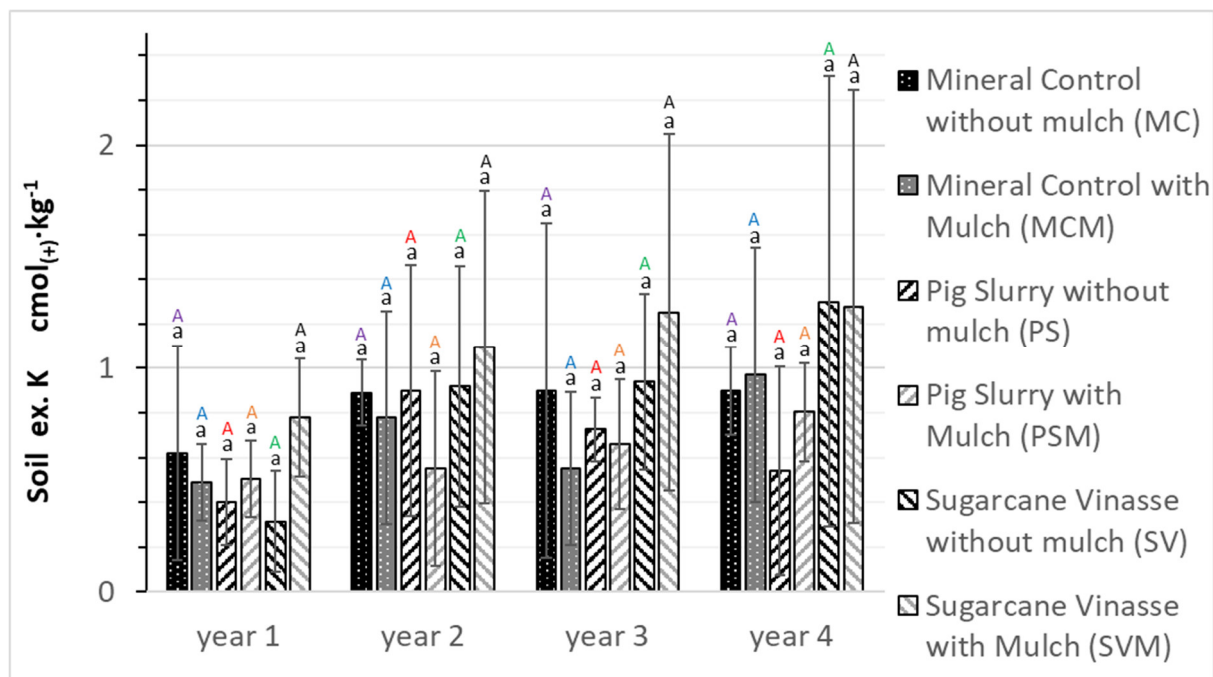

**Figure S5.** Soil exchangeable potassium (ex. K), under each treatment in all four years. Error bars correspond to the standard deviation between replicates for each treatment. Identical letters indicate no significant differences between two treatments in a given year. Small letters compare treatment in a given year and capital letters compare treatments between years.
